# Supplementary material for: The Radical SAM Heme Synthase AhbD from Methanosarcina barkeri Contains Two Auxiliary [4Fe-4S] Clusters
Source: MDPI journal article supplement (doi:10.3390/biom13081268), 2023-08-18
Supplement: s1 [file s1]

## Figure S1

|                   |                                                             |           |
|-------------------|-------------------------------------------------------------|-----------|
| Igni_0397         | -----M                                                      | 1         |
| APE_1655          | -----MRGRWPYEEKPLI                                          | 13        |
| Hbut_0035         | -----MKVGSEHSGYPLHRTWPFERNPLL                               | 24        |
| ST0127            | -----MPFEDAPHL                                              | 9         |
| M1425_1048        | -----MPFENAPHL                                              | 9         |
| SSO1631           | -----MPFENAPHL                                              | 9         |
| SSO1840           | -----MPFENAPHL                                              | 9         |
| Cmaq_1900         | -----MPLDYSQRPLL                                            | 11        |
| Pisl_0113         | -----MREVKKLIERFHSAPLI                                      | 17        |
| Tneu_1901         | -----MRGIRELIERFHSAPLI                                      | 17        |
| Pcal_1716         | -----MRSVEELIRRFHEAPLL                                      | 17        |
| PAE0596           | -----MRNVQELIRRFHEAPLL                                      | 17        |
| Pars_2255         | -----MRNVQELIRRFHEAPLL                                      | 17        |
| Msed_0512         | -----MVAPYV                                                 | 6         |
| AF_2413           | -----MDTPFI                                                 | 6         |
| NP_1546A          | -----MSTGAPIPSPRDIDTSQRPFV                                  | 21        |
| VNG_1185G         | -----MTPVDTSERPVV                                           | 12        |
| Hlac_1215         | -----MFDNLDTDRRPLV                                          | 13        |
| rrnAC3489         | -----MRGKLDLGEQPLV                                          | 13        |
| Hmuk_1679         | -----MRGVDVEERPLV                                           | 12        |
| LRZ99_07755       | -----MI                                                     | 2         |
| Memar_0879        | -----MRNSIGDSGKSEPTL                                        | 15        |
| Mboo_0958         | -----MNDSGAPRI                                              | 10        |
| Mpal_2626         | -----MI-----ENLTKADKELGECGIRTDVVKGIPGGAPPRI                 | 33        |
| Mthe_1135         | -----MLL                                                    | 3         |
| C0624_00890       | -----MSTSQEEFIPKW                                           | 12        |
| Dace_3005         | -----MADQEEKFIPKW                                           | 12        |
| CSA32_02305       | -----MNFIPKW                                                | 7         |
| DSY57_04415       | -----MDFEPKW                                                | 7         |
| B5M56_04105       | -----MSQ-----KHPA-----GEHNGKKAELRL                          | 19        |
| DSCW_66730        | -----MNPHPMYQGSPPHG-----RGSGKNDTLRL                         | 26        |
| DEB50_09370       | -----MAHPH-----KTHPPGHGG-----PHAAGKNNTLRL                   | 26        |
| CSA25_02885       | -----MAHPH-----KTPPHGHAA-----PHAGGKKDILRL                   | 26        |
| DVU_0855          | -----MGAHPTAHGPRTLEDGSPTCKL                                 | 22        |
| Ddes_0287         | MSKHMHHAGGHPGGMPGSAGNPISGHPGAEDGKHRGHPGGHGMSAPLRTLEDGSPACRL | 60        |
| Mbur_1233         | -----MVKPPRL                                                | 7         |
| <b>Mbar_A1458</b> | ----- <b>MIAMTNAPRL</b>                                     | <b>10</b> |
| MA_0573           | -----MIAMTNPPRL                                             | 10        |
| MM_1737           | -----MIAMTNPPRL                                             | 10        |

continued on next page

|                   |                                                                     |                 |
|-------------------|---------------------------------------------------------------------|-----------------|
| Igni_0397         | VFWETTKACKLVCKHCRAEAIEEPL-PDELTHEESLALIDQITEFGRPYPHLIMTGGDVL        | 60              |
| APE_1655          | VFWESTKACLLACKHCRAEALTEPQ-PGELSTREALALVDQVVEFGRPYPILVITGGDPL        | 72              |
| Hbut_0035         | VFWETTKACMLACKHCRAAILKSL-PGELTTEEAYKLIDDVAAFGQPYPIVLVTGGDPL         | 83              |
| ST0127            | VFWEVTKACPLTCKHCRAAIDKPL-PGELTTEEGKKLLEEISQFGK--VVVFTGGDPL          | 66              |
| M1425_1048        | VFWEVTKACPLTCKHCRAAIDKPL-PSELNTEESRKLLIEDIARFGK--VVIVFTGGDPL        | 66              |
| SSO1631           | VFWEVTKACPLTCKHCRAAIDKPL-PGELNTEESRKLLIEDIARFGK--VVIVFTGGDPL        | 66              |
| SSO1840           | VFWEVTKACPLSCKHCRAAIDKPL-PGELSTEESSKKLLIEDIARFGK--VVIVFTGGDPL       | 66              |
| Cmaq_1900         | VFWETTKACPLSCRHCRAAAILKPL-PGELSTDEGKRLIEQLPEFGKPTPVLIITGGDPL        | 70              |
| Pisl_0113         | VFWESTKACPLACKHCRAADAILKPL-PGELNTEEGKRLIEQVASFGDPKPLLITGGDPL        | 76              |
| Tneu_1901         | VFWESTKACPLACKHCRAADAILRPL-PGELNTEEGKRLIEQVASFGDPKPLLITGGDPL        | 76              |
| Pcal_1716         | VFWESTKACPLACKHCRAADAILKPL-PGELSTEEGKRLIEQVAEFGDPKPLLIITGGDPL       | 76              |
| PAE0596           | VFWESTKACPLACKHCRAADAILKPL-PGELTTQEGKRLIEQVAEFGDPKPLLIITGGDPL       | 76              |
| Pars_2255         | VFWESTKACPLACKHCRAADAILKPL-PGELTTQEGKRLIEQVAQFGDPKPLLIITGGDPL       | 76              |
| Msed_0512         | VVLESTKACDLACKHCRAKAIPNRL-PGELTTEEVKSLVDDLASSGV--KLFVISGGDAL        | 63              |
| AF_2413           | VFWELTRACMLACKHCRAKAIRKRH-PDELTTTEECFNVIDQLSEFNP-KPLLIITGGDPL       | 64              |
| NP_1546A          | LIWEVTQACELACDHCRADAKPSRH-PDELTTAEGKRLLDSSAAEFGD-GQLVVLSSGGDPM      | 79              |
| VNG_1185G         | LVWEVTQACALACDHCRASARQHRH-PSELSTAEGKQLLTDAAAFGD-GQLVVLSSGGDPL       | 70              |
| Hlac_1215         | LIWEVTQACGLACRHCRAADAKPARH-PDELSTEEGKRLLDNAATFGD-GQLVVLSSGGDPL      | 71              |
| rrnAC3489         | LIWEVTQACELACKHCRADAQPRRH-PDELSTAEGKALLDQASEFGD-GQLVVLSSGGDPL       | 71              |
| Hmuk_1679         | LIWELTQACGLTCKHCRADARPERH-PDELTTAEGKRLLDQAADFGD-GQLVVLSSGGDPL       | 70              |
| LRZ99_07755       | VSWNTTNACNMYCQHCRYDAGAKA--DEELNTEVEGKALITEIAKAGF--KIMIFSGGEPL       | 58              |
| Memar_0879        | ISWNVTYRCLNLRCAHCYMDAGDGGG-ALELSTSEAKMLIDQVKQAGS--PVLILSGGEPL       | 72              |
| Mboo_0958         | ISWNLTLRCLPLKCAHCVYDAGEKEA-DRVLSTQEALSVIDQIRAIGK--PVVVLSSGEPL       | 67              |
| Mpal_2626         | ISWNLTLRCLPLKCAHCVYDAGEKEA-DRVLSTQEALSVIDQIRAIGK--PVVVLSSGEPL       | 90              |
| Mthe_1135         | VAWESTGACNLSCSYCRASAGPAPS-GDELSTGEIKGLIKEIAPMGA---MLIISGGEPL        | 59              |
| C0624_00890       | IAWETTQRCLNLCVHCRCSSDMDAA-EGDFNTEEAFLKIDDICEVSK--PVMVLSSGEPL        | 69              |
| Dace_3005         | IAWETTRRCLNLCVHCRCSSDMEAA-SGDFNTEEAFLKIDDICEVSK--PVMVLSSGEPL        | 69              |
| CSA32_02305       | IAWEITRRCLNLCVHCRSSSQIEVVEHPDFSYEEAKRVLRDIHSYAN--PVIVLSSGEPL        | 65              |
| DSY57_04415       | IAWETTRRCLNLCVHCRSSSKLEIKGHPDFSLDEAKRVLDDIHSYAD--PVIVLSSGEPL        | 65              |
| B5M56_04105       | VAWETTRNCLNLSRHCRAATMGPY-SGELDTDASFRLLDQIAETGS--PIVILTGGGEPL        | 76              |
| DSCW_66730        | VAWETTRNCLNLSRHCRAAATKGPY-DGELDTDQSFALLDQIAEVGR--PIIILTGGGEPL       | 83              |
| DEB50_09370       | VAWETTRRCLNLTCKHCRAAAEDHVY-NDELTTTEESFRLLDQIREVGQ--PIIILTGGGEPL     | 83              |
| CSA25_02885       | VAWETTRRCLNLTCKHCRAAAQDHVY-KDELTTQESFTLLDQIREVGQ--PIIILTGGGEPL      | 83              |
| DVU_0855          | IAWEVTRSCNLACKHCRAEAHMEPY-PGEFSTDEAKALIDTFPDVGN--PIIIFTGGDPM        | 79              |
| Ddes_0287         | IAWEVTRSCNLACKHCRAEAHPEPY-PGELSTAEAKALIDTFTEVGK--PIIIFTGGDPM        | 117             |
| Mbur_1233         | IAWELTWGONLACVHCRGSSTSEIP-EGELSTSEAKHFVDEIVEMGD--PILILTGGGEPL       | 64              |
| <b>Mbar_A1458</b> | <b>IAWELTAGCNLNCVHCRGASTSSVP-AGELTTDEAKHFIDEVASIGK--PILILSGGEPL</b> | <b>67</b>       |
| MA_0573           | IAWELTAGCNLNCVHCRGASTSSVP-EGELTTEEAKHFIDEVVELGK--PILILSGGEPL        | 67              |
| MM_1737           | IAWELTAGCNLNCVHCRGASTSSVP-EGELTTEEAKHFIDVVELGK--PILILSGGEPL         | 67              |
|                   | : : * * : * : *                                                     | : : : : * * : : |

continued on next page

|                   |                                                                       |            |
|-------------------|-----------------------------------------------------------------------|------------|
| Igni_0397         | MRKDFWDLARYSISKGIRTLVAPSVTPLLTEEKIKKKMKEIGIIGMSLSLDGARAETHDSI         | 120        |
| APE_1655          | MRRDFWRILEYAVSQGLRVAVAPSVTPLLTREVVRMMARMGVARISISIDSGLPVHDAI           | 132        |
| Hbut_0035         | LRSDIWDIIAYAKGKGLRLAVAPAVSPNLTEDEKVKKLAELGVDGVSISLDGSRPEIHDGI         | 143        |
| ST0127            | SRDDIFELMDYAKSLGLIVSIAPSPSHRLDDETMKII SN-SALYMSISLDGYPETHDWL          | 125        |
| M1425_1048        | SRSDIFELMEYAKSLGLVVSIAAPSPSHRLDDETMKII SN-YARYMSISLDGATPQTHDWL        | 125        |
| SSO1631           | SRSDIFELMEYAKSLGLVVSIAAPSPSHRLDDETMKII SN-YARYMSISLDGATSQTHDWL        | 125        |
| SSO1840           | SRSDIFEIMEYAKSLGLIVSIAPSPSYRLRDETMKMISN-YARYMSISIDGATSQTHDWL          | 125        |
| Cmaq_1900         | MREDIFELIDYAKSLNVPVAVSPTVSEKLLSDNVID-ELRRVSSVSVSLDGASPTTHEYI          | 129        |
| Pisl_0113         | MRNDLFDLIDYANQLGVPTSLAPAVSPNLNQEALKAVREHGVKSISISLDGAREETHDEL          | 136        |
| Tneu_1901         | MRNDLFDLVDYAVQLGVPTSLAPAVSPNLSPETLKAIREHGVKAISISLDGAREETHDEI          | 136        |
| Pcal_1716         | MRADLFELVDYANSLGVPVSLAPAVSKSLDDEALRRIKSSGVKSISISLDGATAETHDEL          | 136        |
| PAE0596           | MRSDFELIDYANSLSVPVSLAPAVSPNLNTETLKLKESGVKSISISLDGARPETHDEI            | 136        |
| Pars_2255         | MRADLFELVDYANSLSVPVSLAPAVSPNLTPPEVMKEMKQAGVKSISISLDGAFPETHDEL         | 136        |
| Msed_0512         | KRDDIFEILEYSSAK-ITTALSPSGSR-INVEVAKRIKDTGVSMVSI SV DGP-EEIHDEF        | 120        |
| AF_2413           | MRDDVTEIIISHAAEKGFRVAIAFSGTEKATEEKLRELKEAGVARVAVSIDGSDEEKHDSF         | 124        |
| NP_1546A          | KRDDLVELVRYGTKQGLRMTLTPSGTEALTPDNIAALVDAGLQRMALSV DAP-ATAHDF          | 138        |
| VNG_1185G         | ARPDTVELVEHGTD CGLRMTVTPSGTASLTPTAIEALADAGVAQFAVSI DGP TTHDEF         | 130        |
| Hlac_1215         | ARDDLLELVSYGDDQGLRMTITPSGTQSLTADRIEDLADAGIRRMALSLDGATRESHDRF          | 131        |
| rrnAC3489         | ARGDLPELVEYGTQGLRMTLTPSGTNSITPERLAELDDAGLRLALSIDGGSDAHDTF             | 131        |
| Hmuk_1679         | VRDDVTELVEYGTQGLGMLTTPSGTESLTPERIEALQDAGLRRMALSLDGGDADSHDAF           | 130        |
| LRZ99_07755       | MRPDIIELVAHAKSKGLRPVFGTNGTL-ITLEMAKRLKTAGALAIGISLDSVDVAKHDF           | 117        |
| Memar_0879        | LRDDIFEIAEYGTQGLRMAIGTNGTL-IDDRTAVRLAGAGVRKAAISLDSADPGVHDF            | 131        |
| Mboo_0958         | MRDDLCTIARYGTDRLRMVMGTSGYF-LDRPMAARLKEAGIRAAAI SLDSADPAVHDSF          | 126        |
| Mpal_2626         | LREDMYDIARYGTEQGLRMVMGTSGYL-IDQETAAKLKEAGIRAVAI SLDSKDPATHDAF         | 149        |
| Mthe_1135         | LRQDVFEVARYAAGSGVRVSLASNGTL-ITPEIVDRILLSGISRVSI SLDGASAKTNDAT         | 118        |
| C0624_00890       | LRKDIWEIAQYGTDKGLRMCMTATNGTL-ITDEICQKMKEVDLKMVSLSLDGSTAAIHDDF         | 128        |
| Dace_3005         | MRPDIFEIAEYGTSGGLRMCMTATNGTL-ITDEVCAKMNKADIKMVSLSLDGSTAEIHDDF         | 128        |
| CSA32_02305       | LREDVFDIAAYGTNLGLRMCCLATNGTL-VTEDTCRLIKESGIKMVSLSIDGATAAVHDF          | 124        |
| DSY57_04415       | LREDIFDIATYGAGLGLRMCMTATNGTL-VNQEVCRGMKESGIKMVSLSLDGASAAIHDDF         | 124        |
| B5M56_04105       | LRPDIFDIAAHGTSNGLKMVMAPNGTL-ITEESAKKMADAGISIRISISIDGATREDHDSF         | 135        |
| DSCW_66730        | LRADIFDIAKYGDNLGLRMVMAPNGTL-ITPQIAEKMAASGIRIRISASIDGATKEFHDKF         | 142        |
| DEB50_09370       | LRDDIFDIAAYGDKIGLRMVMAPNGTL-LNEDNVKRLIKSGIKRISVSLDGSTAASHDAF          | 142        |
| CSA25_02885       | LRDDIFDIAAYGDKIGLRMVMAPNGTL-LDEESVTRLMKSGIKRISVSLDGATAASHDAF          | 142        |
| DVU_0855          | MRGDVYELIAYATDKGLRCVMSPNGTL-ITPEHAQRMKASGVQRCSISIDGPDAASHDAF          | 138        |
| Ddes_0287         | IRPDVYELVAYAHSKGLPCAFSPNGTL-ITPETAQKIKNAGVNRCSISIDGADAASHDSF          | 176        |
| Mbur_1233         | VRKDVYEIARYATDKGLRVALATNGTL-LNDGVVKKLKDAGVQRVSI SLDGSTAQTHDDF         | 123        |
| <b>Mbar_A1458</b> | <b>TRPDVFEIARYGTDAGLRVVLATNGTL-LTPEIVEKLRAAGVQRLSVSI DGGANAETHDNF</b> | <b>126</b> |
| MA_0573           | TRSDVFEIARYATDAGLRVVLATNGTL-LTPELVEKLRAAGVQRLSVSI DGGATAKTHDEF        | 126        |
| MM_1737           | TRTDVFEIARYGTDAGLRVVLATNGTL-LTPEIVKKLRDAGVQRLSI SLDGATAKTHDEF         | 126        |
|                   | * * : : . . . * : * : :                                               |            |

continued on next page

|                   |                                                                     |            |
|-------------------|---------------------------------------------------------------------|------------|
| Igni_0397         | RGINGIFERTVELMNFVKKDVGMLQINTAVMRDNVEELPEVFKLITDAGVDAWEVFFYLI        | 180        |
| APE_1655          | RGVPGTFKASVNIVREA-LAAGLPVQINTTVMKPTVDSLPETLKLLLDLGVVDVWEVFFYV       | 191        |
| Hbut_0035         | RGTSGVFEKTLWAIKTF-QEYGVRVQVNTAVMRDNVHDLADIAALLLKLGVKVWEVFFYLV       | 202        |
| ST0127            | RGF-GNYRYAINGIKLG-LKYGIQVQVNTLVWKKSYEELPYIAKLLKDLGVKVWEVFFLI        | 183        |
| M1425_1048        | RGL-GSYKYALRGIELG-LKYGIQVQVNTLVWKKSYSELPFVVKLLKEMGVKIWEVFFLI        | 183        |
| SSO1631           | RGL-GSYKYALRGIELG-LKYGIQVQVNTLVWKKSYSELPFVVKLLKEMGVKIWEVFFLI        | 183        |
| SSO1840           | RGL-GSYNYALRGIELG-LKYGIQVQVNTLVWKKSYSELPFLVKLLKELGVKVWEVFFLI        | 183        |
| Cmaq_1900         | RNRNGVFELTLKAISL-LKAGVKVQVNTTFMKNLVHELPLIVKVLKDLGVYTWEVFFLI         | 188        |
| Pisl_0113         | RGVAGSFRDTVAVIKTA-VDMGIQVQVNTTVWRKSLTELPEVAKLITDLGVRTWEVFFLI        | 195        |
| Tneu_1901         | RGVPGSFRNTLAAIKAA-VDAGVQVQVNTTVWRKSLPELPEVVKLITDLGVKTWEVFFLI        | 195        |
| Pcal_1716         | RGVPGSFAETVSAIKRA-LDLGISVQVNTTVWKKSLSELPDVAYLLRRLGVKVWEVFFLI        | 195        |
| PAE0596           | RGVPGSYKETVNAIKTA-VELGVSQVNTTVWRKSLAELPEVAYLLKNLGVKVWEVFFLI         | 195        |
| Pars_2255         | RGVPGSYKETVTAIKTA-VEIGLPVQVNTTVWKKSLGELPDVAYLLKNLGVKIWEVFFLI        | 195        |
| Msed_0512         | RGVRGAFKMAQAVDSL-HEVKLPVQINSTISRYNVDHLQELRKTVEALRPVYWDVFMFI         | 179        |
| AF_2413           | RGVRGTFRMSMAIENA-KKAGLPFQINTTVTRENIEDLPNIARLCLELGAVMWDVFFV          | 183        |
| NP_1546A          | RGEAGSFERTREAAEAA-RDAGIPLQNTTVCATTVETLPAVREFVAEVGAVLWSVFFLV         | 197        |
| VNG_1185G         | RGEAGSFERTLRAARAI-RELGVPLQVNTTVCADTVEALPAIRDLVAELGVALWSVFFLV        | 189        |
| Hlac_1215         | RGEE-SFESTLEAAEAA-SEAGLPLQINTTVCAETVDELPAIRDRVRDLGAVLWSVFFLV        | 189        |
| rrnAC3489         | RGESGSFEATMAAAEAA-RNLDIPLQINTTVCAETVEQLPAIRDLVADLDAVLWSVFFLV        | 190        |
| Hmuk_1679         | RGESGSFEATLAAAEAA-RETDLPLQINTTVCAETVDQLPAIRELVADLGAVMWSVFFLV        | 189        |
| LRZ99_07755       | RATPGAWQGAQGMRNC-RQAGLPFQIHTTVVDWNYAEVETLTDFAIKEGALAHHTFFLV         | 176        |
| Memar_0879        | RGVAGAWERAVAGIEAC-RDAGIPVQVHTTVTLQNRDLLEGIAEFGESLGVRDQFFFLV         | 190        |
| Mboo_0958         | RGVSGAWERAVAAIKNC-TEEGIGVQINMTAVRPAAGDIESVVALGKNLGVRDYQVFFPV        | 185        |
| Mpal_2626         | RGLDGVWEKATKAIGHC-HDAGIAVQINMSVMRSAISEVEDLIGLGTSLGVHDYQLFFPI        | 208        |
| Mthe_1135         | RG-EGSFDLALRGIRAL-S-GRVEFQINMTITPANIDELDPILDLAEREGAAAHHIFFMV        | 175        |
| C0624_00890       | RSSPGAFEGTIRGAETL-KRNGIKFLVNSSFTRKNQDDIGATFKLAKGLGATAWYMFMI         | 187        |
| Dace_3005         | RQCPGAFEGVKRAAETL-TRNGIKFLINSSFTRKNQHDIANTFKLAKSLGATAWYMFMI         | 187        |
| CSA32_02305       | RNQPAGFTGTMHAIELF-NTHQIDFLVNSSFTRRNKEEAPKIYEMVKTLGATAWYLFMI         | 183        |
| DSY57_04415       | RTQPGAFDGTMNAIKLF-NENNIPFLINSSFTRRNKKEAPKIYQLVKELGATAWYLFMI         | 183        |
| B5M56_04105       | RGVDGAYEGALRGAELA-KEAGIDFQINTTVTRLNMEQLPRIMALAESIGAVAHHIFLLV        | 194        |
| DSCW_66730        | RGVDGAFDAAIRGIEYV-KAAGIEFQINTTITKTNLQIPKILELAEELGAAAHHIFLLV         | 201        |
| DEB50_09370       | RGLDGAFDRAVNGIKTA-KAAGLEFQINTVITKTNLNEIPAILALAESLGAAAHHIFLLV        | 201        |
| CSA25_02885       | RGVDGAFDRAINGIKIA-KAAGLDFQINTVITKTNLDEISAILTLAESLGAAAHHIFLLV        | 201        |
| DVU_0855          | RGVPGAFEQSMRGIGYL-RDAGIEFQINTTVTRDNLHSFKDIFKLCERIGAVAWHIFLLV        | 197        |
| Ddes_0287         | RGVPGAFEASMRGIEYL-KAAGVPFQINTTVTRNNLTSFKKIFELCERIGAAWHIFLLV         | 235        |
| Mbur_1233         | RGVPGAFESSMRGIEYL-KAGGLGFQINTTITKRNIDEIPAILEIATNIGAEAHHIFLLV        | 182        |
| <b>Mbar_A1458</b> | <b>RGMPGAFERTLAGIEVL-RKADFPFQINTTVSKRNLEEITKTFELAKELGAVAYHVFFLV</b> | <b>185</b> |
| MA_0573           | RGVPGAFDRTLAGEIEVL-RKDGFPFQINTTISRNLLEEIPKTFELAKDLGAVAYHVFFLV       | 185        |
| MM_1737           | RGVPGAFERTLAGIEIL-RKADFPFQINTTISRNLLEEIPKTFELAKELGAVAYHVFFLV        | 185        |
|                   | * : . . :                                                           |            |

continued on next page

|                   |                                                                     |            |
|-------------------|---------------------------------------------------------------------|------------|
| Igni_0397         | LTGRASKDLD--LTKDEYWDVSNFLYDASKY-GKTTIRTTEGPFRRVYRLRTVLDDEMGK        | 237        |
| APE_1655          | PTGRAARILD--LTPSEWEDVSNLYDASRY-GV-LVRTVEGPMFRRIALTRRLLENMGL         | 247        |
| Hbut_0035         | PVGRAQLELN--LTPEEWEDVSHFLYEASKY-GL-VVRTSEGPMFRRVAITRMLLELAGK        | 258        |
| ST0127            | PVGRGTLELD--IPREKYKDVIDFLVEVSRY-NI-VVRTVEAPFFRRAKLEYKEV-----        | 234        |
| M1425_1048        | PVGRGTTELD--IPRDKYKDVIDFLVEATRY-DL-VVRTVEAPFFRRAKLEYTPATT---        | 236        |
| SSO1631           | PVGRGTTELD--IPRDKYKDVIDFLVEATRY-DL-IVRTVEAPFFRRAKLEYTPATT---        | 236        |
| SSO1840           | PVGRGVIELD--IPKEKYKDVIDFLVETTRY-DL-VVRTVEAPFFRRAKLEYTPSTI---        | 236        |
| Cmaq_1900         | HVGRGIELEA--LTPEETEDVNVVLYDVSKY-GF-TVRTVEAPFYRRVVLHRYAFENNEI        | 244        |
| Pisl_0113         | VAGRAKEELD--ITPEEYEAQVFLVDVSTY-GL-QVRTVEAPFYRRAKLERLEG-----         | 246        |
| Tneu_1901         | VTGRAREELD--ISPEEYEAQVFLVDVSTY-GI-QVRTVEAPFYRRAKLERLEG-----         | 246        |
| Pcal_1716         | VTGRAREELD--ISPAEYESAVQVFLVDVSTY-GF-QVRTVEAPFYRRAKLERLRG-----       | 246        |
| PAE0596           | VTGRAREELD--ITPEEYEAQVFLVDVSTY-GF-QVRTVEAPFYRRAKLERLRG-----         | 246        |
| Pars_2255         | VTGRAREELD--ITPEEYEAQVFLVDVSTY-GF-QVRTVEAPFYRRAKLERLEG-----         | 246        |
| Msed_0512         | PTGRATKEMM--ITSEQAEEVMRTITKW-RM-EGLNVRMTCAPYLVRVMNEMGVVR----        | 231        |
| AF_2413           | PTGRAKAEMM--PTPQQFEDVLCWLYDLSKK-TGLNVKSSAATHLRRIELMRDRGE----        | 236        |
| NP_1546A          | PVGRGQILD--IQPERAESVLEWLQDVSEA-APFGVKTTEAPHYRRVALQRNGSA----         | 250        |
| VNG_1185G         | PVGRGRALDP--VSPARAEVMAWLDGVAR-S-EAFGVKTTEAPMYRRVRAQRGGD-----        | 242        |
| Hlac_1215         | AVGRGRILEP--IAPERAEVMEWLHGVAES-EPFGVKTTEAPFYRRVGLQSDGD-----         | 241        |
| rrnAC3489         | PVGRGRVLT--IDPERAERVVKWLHEVSDE-ASFGLKTTEAPHYRRVAMEQQDEG----         | 243        |
| Hmuk_1679         | PVGRGRVLTQ--ISPDRAERVMEWLHEVSES-EPFGLKTTEAPHYRRVTIERERD-----        | 242        |
| LRZ99_07755       | PTGRAVNIEQETLKAEQYKLLHRIMTKQQQ-VAIELKPTCAPQFMRIAKQLGVK-----         | 230        |
| Memar_0879        | PTGRGKEVVD--ISPEMYESLIRRLRLRAD-RGLSIRPTCAPQYVRIAAGMGLP-----         | 242        |
| Mboo_0958         | PTGRAGGTGP--ENPREYEDVIRRVLLKYCD-SNVNLRPTCAPQFRRIAADLGVT-----        | 237        |
| Mpal_2626         | PTGRARQIEP--RSPEEYEMIRRLIRYRD-SRINIRPTCAPQFRRIADCEGIA-----          | 260        |
| Mthe_1135         | PTGRGRAV--ECISPEMQRSLE---RIASEERSIEIRPTCAPQYGRVLMKKGS-----          | 225        |
| C0624_00890       | PTGRGEEIMNELITKEDYEEILSWHYEQEKNEDDILMRPTCAPHYRIVPQMAKAEGVDF         | 247        |
| Dace_3005         | PTGRGEEIMNELVSKEDYEEILSWHYEQEKNEDDILMRPTCAPHYRIVPQMAKAEGVDF         | 247        |
| CSA32_02305       | PTGRGEDIMAELIPEEEYEDILNWHYDMETESDLLVRPTCAPHYRIVLQRSKEEGSRF          | 243        |
| DSY57_04415       | PTGRGEEIMEELIPESEYEDMLNWHYDMKKESDMLVRPTCAPQYRIVLQRAKKEGEKF          | 243        |
| B5M56_04105       | PTGRGREMAEQAISAQDYENTLNWFYDQQKI-SSLQLKATCAPQYRIVLRQARARMENISV       | 253        |
| DSCW_66730        | PTGRGKYIVDQAIDAESYESTLNWFYDQREK-TSLQLKATCAPHYRILRQARARDEGKTI        | 260        |
| DEB50_09370       | PTGRGKYIVDTAIDAKEYEETLNWFYDQRDK-TSLQLKATCAPHYRILRQARAKADGKKV        | 260        |
| CSA25_02885       | PTGRGKYIVDTAIDAKEYEETLNWFYDQRDK-TSLQLKATCAPHYRILRQARAKAEGRKV        | 260        |
| DVU_0855          | PTGRAAGLSQDVISAAEYEEVLNWFYDQFRKT-TSMHLKATCAPHYRIMRQRAKEEGVSV        | 256        |
| Ddes_0287         | PMGRAAGLADQVITAQYEDVLHWLYDQFRKT-TKMHLKATCAPHYRIMRQRAKEEGVSV         | 294        |
| Mbur_1233         | PTGRGKELENEEIIPAEYERVNLNWFYDQQKH-VKIQLKATCAPHYFRIMRQRAKREGTEV       | 241        |
| <b>Mbar_A1458</b> | <b>PTGRGDE--SDEVSPADYERILHWFYEMQKE-SKIQLKATCAPHYFRIMRQRAKKEGIEI</b> | <b>242</b> |
| MA_0573           | PTGRGEE--SDEVSPADYERVNLHWFYDMQKE-SEIQLKATCAPHYFRIMRQRAKKEGIEI       | 242        |
| MM_1737           | PTGRGEE--SDEVSPADYERVNLHWFYDMQKE-SEIQLKATCAPHYFRIMRQRAKKEGIEI       | 242        |

\*\*. .

:: .

continued on next page

|                   |                                                             |            |
|-------------------|-------------------------------------------------------------|------------|
| Igni_0397         | GPE-ELGVGELYKLRERLEELMGVPV-----HGPPKQKRAPSAYTRDGYGIIFVAY    | 288        |
| APE_1655          | DWRNRLRPGSLYHKLARKTLELLG--D-----PPGEARAQTTGTRDGKGVIFVSN     | 295        |
| Hbut_0035         | NPDEALNTGPLYRQLVSRRLRQLLG--E-----PQGKPLASTTGTDRDGKGVIFVSY   | 306        |
| ST0127            | -----KNELIRKLKELLG--E-----SKSPVDKSILPTRDGAGVIFISY           | 271        |
| M1425_1048        | -----NDNELVSTLRELLG--E-----PVKEADKSILPTRDGAGVIFIGY          | 274        |
| SSO1631           | -----NDNELVSTLRELLG--E-----PVKEADKSILPTRDGAGVIFIGY          | 274        |
| SSO1840           | -----KSNELVSKLRELLG--E-----PVKDVDKSVLPTRDGSGVIFIGY          | 274        |
| Cmaq_1900         | N--IKPNLGPLYRQLYEGLIKVMGNEP-----PKLTKRPMVARTRDGDGIIFVAY     | 292        |
| Pisl_0113         | ----KTYDSPLYRKLVGRLRELMG--P-----PRRGIDPTIVPTRDGFGIIFVAY     | 290        |
| Tneu_1901         | ----KTYDSPLYRKLVRLGELMG--P-----PRRGVDPTVVPTRDGFGIIFVAY      | 290        |
| Pcal_1716         | ----KAYSDDLKLVARLRELLG--P-----PQRGVDPTIVPTRDGFGIIFVGH       | 290        |
| PAE0596           | ----REFGHPLYNQLVERLRNLMG--P-----PVRVDPTIVPTRDGFGIIFIAY      | 290        |
| Pars_2255         | ----RIYDHPLYLQLVDKLRKLLG--P-----PTRGVDPTIVPTRDGFGIIFVAY     | 290        |
| Msed_0512         | ----P-----LP-----PDKNYGRRSVNGARGCMAGNGYAFVAY                | 261        |
| AF_2413           | ----MPAVGELYRLLERIEDFPEGEGIVVAGGHGKSLSTDGIRRAIGITDGRGMFFISH | 292        |
| NP_1546A          | ----T-----DAPDADAIGRRGGIIAGDGFVSH                           | 276        |
| VNG_1185G         | -----APQRRAGVTAGDGFVSH                                      | 261        |
| Hlac_1215         | -----EEATRRRGGITAGRGFVSH                                    | 262        |
| rrnAC3489         | ----A-----SGLKRRMGIRAGKGFVSH                                | 264        |
| Hmuk_1679         | ----E-----AGENDGLQRRTGIRAGQGFAVSH                           | 267        |
| LRZ99_07755       | -----M-RFSKGCLAGTGyciisp                                    | 248        |
| Memar_0879        | -----VAEGERGCIAGIRYCRIDP                                    | 261        |
| Mboo_0958         | -----KPDWGRGCIAGISYCRIFA                                    | 256        |
| Mpal_2626         | -----NPAWGRGCLAGITYCRIFA                                    | 279        |
| Mthe_1135         | -----QARTAGGCIAGIRFVFISR                                    | 244        |
| C0624_00890       | ERRSL-----TFSTGGGKGCIAAQTICLIDC                             | 273        |
| Dace_3005         | KRRSL-----TFSTGGGKGCIAAQTICLIDC                             | 273        |
| CSA32_02305       | RRRSL-----KFSTGGSKGCLAGQLICLIDV                             | 269        |
| DSY57_04415       | KRRNL-----KFSTGGSKGCLAGQLICLIDV                             | 269        |
| B5M56_04105       | SFKTH-----GLD-AVTRGCLGGVSFCFISH                             | 278        |
| DSCW_66730        | SFESH-----GLD-AVTRGCLAGTGFCFISH                             | 285        |
| DEB50_09370       | SFETH-----GLD-AVTRGCLAGTGFCFISH                             | 285        |
| CSA25_02885       | SFKTH-----GLD-AVTRGCLAGTGFCFISH                             | 285        |
| DVU_0855          | TPDNF-----GMD-AMTRGCLGGTGFCFISH                             | 281        |
| Ddes_0287         | TPENF-----GMD-ALTRGCLGGTGFCFISH                             | 319        |
| Mbur_1233         | TVKTH-----GYE-AMTRGCLGGISFCFVSS                             | 266        |
| <b>Mbar_A1458</b> | <b>SVKTH-----GYE-AMTKGCLGGTGFCFVSS</b>                      | <b>267</b> |
| MA_0573           | SVKTH-----GYE-AMTKGCLGGTGFCFVSS                             | 267        |
| MM_1737           | SVKTH-----GYE-AMTKGCLGGTGFCFVSS                             | 267        |

continued on next page

|                   |                                               |                                         |                 |                 |                            |                         |                  |                          |                           |                  |     |
|-------------------|-----------------------------------------------|-----------------------------------------|-----------------|-----------------|----------------------------|-------------------------|------------------|--------------------------|---------------------------|------------------|-----|
| Igni_0397         | NGDVYPSGFLPYKVGNVREASLKEIYQNSKALKMIRDPSNFRPP  | CGTCKFNFMCGGSRAR                        | 348             |                 |                            |                         |                  |                          |                           |                  |     |
| APE_1655          | KGLVYPSGFLPYVGDVRKSSLKEIYQSSPELEGLRK-AVFKGR   | CGRCEFSQLCGGSRAR                        | 354             |                 |                            |                         |                  |                          |                           |                  |     |
| Hbut_0035         | NGTVYPSGFMPYPLGNIRVKSLEIYRENILKRLRG-ARFEGRC   | CGRCEFREICGGSRAR                        | 365             |                 |                            |                         |                  |                          |                           |                  |     |
| ST0127            | NGDIYPSGFLPLKLGNVREDRLIDVYRNSELLKMIKA-GKLKGK  | CGICAFSNICGGSRAR                        | 330             |                 |                            |                         |                  |                          |                           |                  |     |
| M1425_1048        | NGDVYPSGFLPLYLGNVKKESLVDIYRKSEVLKKIKD-SRFEGK  | CGICKYNNICGGSRAR                        | 333             |                 |                            |                         |                  |                          |                           |                  |     |
| SSO1631           | NGDVYPSGFLPLYLGNVKKESLVDIYRKSEVLKKIKD-SRFEGK  | CGICKYNNICGGSRAR                        | 333             |                 |                            |                         |                  |                          |                           |                  |     |
| SSO1840           | NGDVYPSGFLPLYLGNVRKESIVDIYRKSEVLKKIKD-GRFDGK  | CGVCKFNNICGGSRAR                        | 333             |                 |                            |                         |                  |                          |                           |                  |     |
| Cmaq_1900         | NGDVSPSGFLPIKLGNVKEESLVKIYRENPVLLRIRR-GEYGGRC | GLCEFRFICGGSRAR                         | 351             |                 |                            |                         |                  |                          |                           |                  |     |
| Pisl_0113         | DGTVYPSGFLPYPLGNVRRRSLVEIYREHPLLQKMRR-GEFGGRC | GVCKYKDICGGSRAR                         | 349             |                 |                            |                         |                  |                          |                           |                  |     |
| Tneu_1901         | DGTVYPSGFLPYPLGNVRRRSLVEIYRDHPLLQKMRR-GEFGGRC | GVCKYKDICGGSRAR                         | 349             |                 |                            |                         |                  |                          |                           |                  |     |
| Pcal_1716         | DGTVTPSGFLPYPLGNVRKRLVDIYRNHPLLVKMRR-GEFEGRC  | GVCEYKDICGGSRAR                         | 349             |                 |                            |                         |                  |                          |                           |                  |     |
| PAE0596           | DGTVHPSGFLPYPLGNVRKQSLVKIYREHPLLQKMRR-GEFGGRC | GVCEYKDICGGSRAR                         | 349             |                 |                            |                         |                  |                          |                           |                  |     |
| Pars_2255         | DGTVHPSGFLPYPLGNVRRQSLVEIYRNHPLLQKMRR-GEFGGRC | GVCRYKDICGGSRAR                         | 349             |                 |                            |                         |                  |                          |                           |                  |     |
| Msed_0512         | DGTVYP                                        | CGFLPIPAGNVRRFRFSEIYEQSPVFKSLREPSKLGKCG | GLCEYRSVCGGCRAR | 321             |                            |                         |                  |                          |                           |                  |     |
| AF_2413           | IGEYVPSGFLPIVAGNVNRTSLKEIYYSSEIFVNLRDPDR      | LKGKCGRCEYRKICGGSRAR                    | 352             |                 |                            |                         |                  |                          |                           |                  |     |
| NP_1546A          | TGELFPSGFLPKSAGNVTDSDLVSLYQDSTLFESLRDR        | DLKKGKCGACEFRHVCGGSRAR                  | 336             |                 |                            |                         |                  |                          |                           |                  |     |
| VNG_1185G         | TGAVYPSGFLPSSAGNVRRERSVVDSYRNSELFQRLRDTEAL    | TGKCGACSFRTVCGGSRAR                     | 321             |                 |                            |                         |                  |                          |                           |                  |     |
| Hlac_1215         | TGEAYPSGFLPESAGNVHDSIVDIYRNGDLFESLREPDR       | LKGKCGACEFRQVCGGSRAR                    | 322             |                 |                            |                         |                  |                          |                           |                  |     |
| rrnAC3489         | TGEVFPSPGFLPKSAGSVREESVVDIYRDSPLFQQLRDD       | DALTGKCGACRYRTVCGGSRAR                  | 324             |                 |                            |                         |                  |                          |                           |                  |     |
| Hmuk_1679         | TGEMYPSGFLPESAGNVRRSEGVVDLYRESALFQRLRDD       | SALEGKCGACPYRGVCGGSRAR                  | 327             |                 |                            |                         |                  |                          |                           |                  |     |
| LRZ99_07755       | KGIVQPCAYLNI                                  | PAGNVRET                                | PFSEIWRD        | NAVFNR          | LRNQ-PLQGGCGTCDYQKICGGCRAR | 307                     |                  |                          |                           |                  |     |
| Memar_0879        | TGEVTPCPYLP                                   | PLGLGNIRRT                              | PF              | FAEIWNGSEV      | FAALRS                     | GEGLRGKCGACEYRSACGGCRAR | 321              |                          |                           |                  |     |
| Mboo_0958         | NGDVT                                         | PCPYLPVS                                | AGNV            | RDIPF           | DIWNE                      | SHLFAL                  | RD               | PNRLTGKCGRCEYKTTCCGGCRAR | 316                       |                  |     |
| Mpal_2626         | NGDVT                                         | PCPYLPVS                                | AGNV            | RTT             | PFSEI                      | WNN                     | SPLFA            | AL                       | RDPSRLTGKCGRCSFKTSCGGCRAR | 339              |     |
| Mthe_1135         | TGDV                                          | FPCGYF                                  | PLS             | AGSIR           | DRSFSEI                    | WSS                     | PLL              | N                        | DLRER-RLKGR               | CGSCNYVRICGGCRAR | 303 |
| C0624_00890       | FGNLKPCSYFHSS                                 | VGNVKQIPFKEL                            | WFNNKVFNDLR     | DFSKYKKGKCGECE  | FLNVC                      | GGCRAR                  | 333              |                          |                           |                  |     |
| Dace_3005         | FGNLKPCSYFHSS                                 | VGNVKQIPFKDL                            | WFNSKVFNDLR     | DFSKYKKGKCGECE  | FINVC                      | GGCRAR                  | 333              |                          |                           |                  |     |
| CSA32_02305       | DGNILPCSYFPLSD                                | SNIRDKSFKDI                             | WENSPL          | LLTDMRNFSQYKGS  | CGRCEYIQV                  | CGGCRAR                 | 329              |                          |                           |                  |     |
| DSY57_04415       | DGNVLP                                        | CSYF                                    | PKAAGNIRS       | QSFQDI          | WENSTLFHEL                 | RD                      | FKSYKGS          | CGHCEYVNV                | CGGCRAR                   | 329              |     |
| B5M56_04105       | VGIVQPC                                       | G                                       | FLELNC          | GDVTSQH         | FGEI                       | WRDSVIFNN               | LRNYDML          | GGKCGICEYKRV             | CGGCRAR                   | 338              |     |
| DSCW_66730        | TGIVQPC                                       | GYTD                                    | VKCGDIT         | TRDTF           | GHVWRNSP                   | VFLKLR                  | DFKQLEGK         | CGRCEYRAV                | CGGCRAR                   | 345              |     |
| DEB50_09370       | VGRVQTC                                       | G                                       | FLDVT           | CGDIK           | TS                         | HF                      | KDVWENSEVFN      | KLRDFNNLEPK              | CGICEYKQV                 | CGGCRAR          | 345 |
| CSA25_02885       | VGRVQTC                                       | G                                       | FLDVT           | CGDIK           | TH                         | HF                      | KDVWENSEVFN      | KLRNFNNLDPK              | CGLCEYKQV                 | CGGCRAR          | 345 |
| DVU_0855          | TGQVQPC                                       | G                                       | YLELDC          | GNVRNT          | PFPEI                      | WRKSEH                  | FRQFRTQEE        | YTGKCGPCEYHKV            | CGGCRAR                   | 341              |     |
| Ddes_0287         | VGQVQPC                                       | G                                       | YLELDC          | GNVRQT          | PF                         | PKI                     | WRESKH           | FLQFRDQSCYSGK            | CGECEYHKV                 | CGGCRAR          | 379 |
| Mbur_1233         | TGDVQPC                                       | G                                       | YLP             | VIAGNI          | KEKSFKEI                   | WEDSVL                  | FN               | DLRDYDKLGGK              | CGRCSYKNV                 | CGGCRAR          | 326 |
| <b>Mbar_A1458</b> | <b>VGKVFPCGYLPV</b>                           | <b>LAGNIREQPF</b>                       | <b>REI</b>      | <b>WENAEVFR</b> | <b>KLRDPEEL</b>            | <b>KGKCGICEYK</b>       | <b>KVCAGCRAR</b> | <b>327</b>               |                           |                  |     |
| MA_0573           | VGEVYPC                                       | G                                       | YLPV            | LAGNIREQ        | PFKEI                      | WENSEVFR                | KLRDPEEL         | KGKCGICEYK               | KVCAGCRAR                 | 327              |     |
| MM_1737           | VGEVYPC                                       | G                                       | YLPV            | LAGDIRA         | QPF                        | KDVWENSEVFR             | KLRDPEEL         | KGKCGICEYK               | KVCAGCRAR                 | 327              |     |

\* . : .. : : : : \*\* \* : \*.\*\*.\*

continued on next page

|                   |                                            |                                                      |            |
|-------------------|--------------------------------------------|------------------------------------------------------|------------|
| Igni_0397         | AYS                                        | FKDPFGHDPACKLPEVLES-LDPQVVEEALRPFGRAX <sub>5</sub>   | 393        |
| APE_1655          | AYS                                        | TGDPLGEDPACAYRPGEFRSLLQELGVGEADVYGLVEX <sub>8</sub>  | 403        |
| Hbut_0035         | AYAV                                       | TGKPFGEDPACPYPRTGTFSSVMVSKLGVRVENNVREIE <sub>9</sub> | 415        |
| ST0127            | AYAV                                       | YGDPLAEDPACPY                                        | 347        |
| M1425_1048        | AFAV                                       | YNNPFAEDPMCPY                                        | 350        |
| SSO1631           | AFAV                                       | YNNPFAEDPMCPY                                        | 350        |
| SSO1840           | AFAV                                       | YNNPFAEDPMCPY                                        | 350        |
| Cmaq_1900         | AYAE                                       | YGDPLAEDPACVYSPGTIRLPESLSP                           | 382        |
| Pisl_0113         | AFAY                                       | FKDPLAEDPACIYSPPL                                    | 370        |
| Tneu_1901         | AFAY                                       | FKDPLAEDPACVYKP                                      | 368        |
| Pcal_1716         | AFAV                                       | FKNPLAEDPACVYIPSSWKSVMTR                             | 378        |
| PAE0596           | AFAY                                       | FKDPLAEDPACVYKPHRNL                                  | 372        |
| Pars_2255         | AFAY                                       | YKDPLAEDPACIYKPT                                     | 369        |
| Msed_0512         | AFSL                                       | TENFMDEDPFCTYVPRTLRVRA                               | 347        |
| AF_2413           | AYAV                                       | HGDYLAEEPCCIYIPQSSR                                  | 375        |
| NP_1546A          | AYAV                                       | TGDPLASDPLCAYRPSGYDGPLPDRQAAADR                      | 371        |
| VNG_1185G         | AYAT                                       | TGEPMASDPLCPHVPDGYDGPLPDRQATADD                      | 356        |
| Hlac_1215         | AFAT                                       | TGDPLESDPLCPYVPDGYDGELPPTLKDGFEGSTSAPX <sub>4</sub>  | 367        |
| rrnAC3489         | AYAT                                       | TGDPLAADPLCDYRPDGFEGSVDPQHPAD                        | 357        |
| Hmuk_1679         | AYAA                                       | TGDPMGSDPLCSFVPDEYDGPLPATHGERVPTD                    | 364        |
| LRZ99_07755       | AYYY                                       | HGDYMAEEPWCILYHGRKGY                                 | 330        |
| Memar_0879        | AYGVTQE                                    | RSGTGDCLAEDPWCLYEPGVR                                | 349        |
| Mboo_0958         | AYRGAEAFSSRWCDGLLKPSAIGELCAEDPWCPYEPGGS    |                                                      | 356        |
| Mpal_2626         | AYRQEDAASPLWCDGLATPDIVNGEICGEDPWCPYQPPDVIP |                                                      | 381        |
| Mthe_1135         | AYAL                                       | TGDYLGEDPTCAWRGSIG                                   | 325        |
| C0624_00890       | ADAV                                       | YGDYMQQEPFCNYVPERMRKKMHKEAEEMAPK                     | 369        |
| Dace_3005         | ADAV                                       | YGDYMAEEPFCNYIPRKTRLRMEKEAAENRGE                     | 369        |
| CSA32_02305       | AYAM                                       | TGDYMAEEPFCITYQPSRKMRTQL                             | 356        |
| DSY57_04415       | AYAV                                       | TGDYLAPEPFCSYQPK                                     | 349        |
| B5M56_04105       | AYEA                                       | TGDYLAEEPLCVYQPAKQSQPL                               | 364        |
| DSCW_66730        | AYEA                                       | TGNYMAEEPCLCAYQPEKAAPC                               | 370        |
| DEB50_09370       | AYEA                                       | TGNYLAQEPLCTYQPPRH                                   | 367        |
| CSA25_02885       | AYEA                                       | TGNYLAQEPLCTYQPARHKSAV                               | 371        |
| DVU_0855          | AYNM                                       | SGDHMAEEPCLCSYKPRRMTPCR                              | 367        |
| Ddes_0287         | AHSM                                       | DGDHMGEEPLCTYIPAKMRKKGRDGKS GEEK                     | 414        |
| Mbur_1233         | AYAA                                       | TGDYMAEEPYCIYNPR                                     | 346        |
| <b>Mbar_A1458</b> | <b>AYAA</b>                                | <b>TGDYLEEEPYCIYRPGKK</b>                            | <b>349</b> |
| MA_0573           | AYAA                                       | TGDYLEEEPYCIYRPGKK                                   | 349        |
| MM_1737           | AYAA                                       | TGDYLEEEPYCIYRPGKK                                   | 349        |
|                   | *                                          | * * *                                                |            |

**Figure S1.** Amino acid sequence alignment of AhbD sequences from different archaea and sulfate-reducing bacteria. Conserved N-terminal cysteine residues coordinating the RS cluster are highlighted in violet purple, C-terminal cysteine residues in raspberry, and partially conserved cysteine residues of the full SPASM motif in salmon. Sequences are specified by gene numbers.



**Figure S2**

|                   |           |                                                                      |            |
|-------------------|-----------|----------------------------------------------------------------------|------------|
| anSME_CPE0635     | 6         | LLIKPASSGCNLKITYCFYHSLSDNRNVKSYGIMRDEVLES MVKRVLNE--ADGHCSFAF        | 63         |
| SuiB_STRSU        | 108       | ELVIYPSMYCDLKQGFCLANREDRN-----AKPAKDWERILRQAKDNGVLSVSI               | 157        |
| PQQE_KLEPN        | 13        | WLLAELTYRCPLQCPYCSNPLDFARQDK-----ELTTEQWIEVFRQARAMGSVQLGF            | 64         |
| MFTC_MYCTU        | 21        | CLTWELTYACNLACVHCLSSSG-KRDPG-----ELSTRQCKDIIDELERMQGFYVNI            | 71         |
| DVU_0855          | 22        | LIWEVTRSCNLACKHCRAEAHMEPYPG-----EFSTDEAKALIDTFPDVGNPIIIF             | 73         |
| Ddes_0287         | 60        | LIWEVTRSCNLACKHCRAEAHPEPYPG-----ELSTAEAKALIDTFTEVGKPIIIF             | 111        |
| Mbur_1233         | 7         | LIAWELTWGCNLACVHCRGSSTSEIPEG-----ELSTSEAKHFVDEIVEMGDPILIL            | 58         |
| <b>Mbar_A1458</b> | <b>10</b> | <b>LIAWELTAGCNLCVHCRGASTSSVPAG-----ELTTDEAKHFIDEVASIGKPIILIL</b>     | <b>61</b>  |
|                   |           | : : * * * . *                                                        | . . . :    |
| anSME_CPE0635     |           | QGGEPILAGLEFFERLMELQRKHNYKNLKIYNSLQTNGTLIDESWAKFLSENKF-LVGLS         | 122        |
| SuiB_STRSU        |           | LGGEPTRYFD-IDN----LLI--ACEELKIKTTITNAQLIKKSTVEILAKSKYITPVLS          | 210        |
| PQQE_KLEPN        |           | SGGEPLTRKD-LPE----LIR--AARDLGFYTNLITSGIGLTSKLDASFSEAGLDHIQIS         | 117        |
| MFTC_MYCTU        |           | GGGEPTVRPD-FWE----LVD--YATAHHVGKFKSTNGVRITPEVATRLAATDYVDVQIS         | 124        |
| DVU_0855          |           | TGGDPMMRGD-VYE----LIA--YATDKGLRCVMSPNGTLITPEHAQRMKASGVQRC SIS        | 126        |
| Ddes_0287         |           | TGGDPMIRPD-VYE----LVA--YAHSGKLPCAFSPNGTLITPETAQKIKNAGVNRCSIS         | 164        |
| Mbur_1233         |           | TGGEPLVRKD-VYE----IAR--YATDKGLRVALATNGTLNDGVVKKLKDAGVQRV SIS         | 111        |
| <b>Mbar_A1458</b> |           | <b>SGGEPLTRPD-VFE----IAR--YGTDAGLRVVLATNGTLTPEIVEKLRAGVQRLSVS</b>    | <b>114</b> |
|                   |           | **:* . : : . : . . : : *                                             |            |
| anSME_CPE0635     |           | MDGPKEIHNLNRKDCGLDTFSKVERAAELFKKYKV-EFNILCVVTSNTARHVNKIYRYF          | 181        |
| SuiB_STRSU        |           | LQTLDSKLNFEMLMGR--PD--RQIKLAKYFNEVGK-KCRINAVYTKQSYEQIIELVDFC         | 265        |
| PQQE_KLEPN        |           | FQASDEVNLNAALAGNK--KAFQOKLAMAKAVKARDY-PMVLNFVLHRRHNDQLDKIIELC        | 174        |
| MFTC_MYCTU        |           | LDGATAEVDNDAIRGT---GSFDMAVRALQNLAAAGFAGVKISVITRRNVAQLDEFATLA         | 181        |
| DVU_0855          |           | IDGPDAAASHDAFRGVP--GAFEQSMRGIYLRDAGI-EFQINTTVTRDNLHSEFKDIFKLC        | 183        |
| Ddes_0287         |           | IDGADAASHDSFRGVP--GAFEASMRGIEYLKAAGV-PFQINTTVTRNNLTSFKKIFELC         | 221        |
| Mbur_1233         |           | IDGSAQTHDDFRGVP--GAFESSMRGIEYLKAGGL-GFQINTTITKRNIIDEIPALIEIA         | 168        |
| <b>Mbar_A1458</b> |           | <b>IDGANAETHDNFRGMP--GAFERTLAGIEVLRKADF-PFQINTTVSKRNLEETIKTFELA</b>  | <b>171</b> |
|                   |           | :: : . . . . . : . . . . .                                           |            |
| anSME_CPE0635     |           | KEKDFKFLQFINCLDPLYEEKGYNYSLKPQDY-TKFLKNLFDLW-----YEDFLNGNR           | 234        |
| SuiB_STRSU        |           | IENKIDRFVS-ANYSEVTGYTKIKKK-YDLADL-RRLNEYVTD----YITQREANLNFAT         | 318        |
| PQQE_KLEPN        |           | IELEADDVEL-AT-----CQFYGWAFLNREGLLPTREQIARAEQ                         | 212        |
| MFTC_MYCTU        |           | SRYGAT-LRI-TRLRPSGRGTDVWADLHPTADQQVQLYDWLVSKGERV-----L               | 228        |
| DVU_0855          |           | ERIGAVAWHI-FLLVPTGRAAGLSQVISAEEY-EEVLNWFYDFRKTTSMHL-----KAT          | 236        |
| Ddes_0287         |           | ERIGAAAWHI-FLLVPMGRAAGLADQVITAQEY-EDVLHWLYDFRKTTKMHL-----KAT         | 274        |
| Mbur_1233         |           | TNIGAEAAHI-FLLVPTGRGKELENEEIPPAEY-ERVNLWFYDQQKHVKIQL-----KAT         | 221        |
| <b>Mbar_A1458</b> |           | <b>KELGAVAYHV-FFLVPTGRGDE--SDEVSPADY-ERILHWFYEMQKESKIQL-----KAT</b>  | <b>222</b> |
|                   |           | . . . . .                                                            |            |
| anSME_CPE0635     |           | VSIRYFDGLL-----ETIL--LG-----KSSSGMNGTCTCQFVVESDGSVYPCDFYVLD          | 282        |
| SuiB_STRSU        |           | EGCHLFTAYP-----ELINNSIEFSEFDEMYYGCRAKYTKMEIM--SNGDILPCIAFLGV         | 371        |
| PQQE_KLEPN        |           | VVADYRQKMAASGN-LTNLLFVTDPDYEEERPCKGMGWGSIFLSVTPEGTALPCHSARQL         | 271        |
| MFTC_MYCTU        |           | TGDSFFHLAP-----LGQSGALAGLNMCGAGRVVCLID--PVGDVYACPFIAHD               | 275        |
| DVU_0855          |           | CAPHYYRIMRQRAKEEGVSVPDNFGMDAMTRGCLGGTGFCFIS--HTGQVQPCGYLEL-          | 293        |
| Ddes_0287         |           | CAPHYYRIMRQRAKEEGVSVPENFGMDALTRGCLGGTGFCFIS--HVGQVQPCGYLEL-          | 331        |
| Mbur_1233         |           | CAPHYFRIMRQRAKREGTEVTVKTHGYEAMTRGCLGGISFCFVS--STGDVQPCGYLPV-         | 278        |
| <b>Mbar_A1458</b> |           | <b>CAPHYFRIMRQQAQKKEGIEISVKTHGYEAMTKGCLGGTGFCFVS--SVGKVFPCGYLPV-</b> | <b>279</b> |
|                   |           | . . . . . * *                                                        |            |
| anSME_CPE0635     |           | KWRLGN-IQDMTMKELFETNKNHFEIKSSFVHEEKKCKWFKLCKGGCRRCRDSKEDSD           | 341        |
| SuiB_STRSU        |           | NQTKQN-AFEKDLLDVWYDDPLYGGIRSFRTKNSKQLSCGLLKIIEGGCYVNLIKEKSPE         | 430        |
| PQQE_KLEPN        |           | PVAFPS-VLEQSLESIWYDSFGFNRYRGYDWMPEPCRS CDEKEKDFGGCRCAQAFMLTGSA       | 330        |
| MFTC_MYCTU        |           | HFLAGNVLSGGGFQNVWKNSSLFRELREPQS-AGACGSCGHYDSRGGCMAAKFFTGLPL          | 334        |
| DVU_0855          |           | --DCGN-VRNTPFPEIWRKSEHFQRTQEEYTGKGPCEYHKVC-GGCRARAYNMSGDH            | 349        |
| Ddes_0287         |           | --DCGN-VRQTPFPKIWRKSEHFLQFRDQSCYSGKCGCEYHKVC-GGCRARAHSMGDH           | 387        |
| Mbur_1233         |           | --IAGN-IKEKSFKIEWEDSVLFNDLRDYDKLGKCGRC SYKNVC-GGCRARAYAATGDY         | 334        |
| <b>Mbar_A1458</b> |           | <b>--LAGN-IREQPFREIWENAEVFRKLDPPEELKKGCGICEYKKVC-GGCRARAYAATGDY</b>  | <b>335</b> |
|                   |           | . : : .:: . : * * . .**                                              |            |
| anSME_CPE0635     |           | LELNYYCQSYKEFFEYAFPRLI-----NVANNIK-----                              | 370        |
| SuiB_STRSU        |           | YFRDSVCQL-----                                                       | 439        |
| PQQE_KLEPN        |           | DNADPVCCKSPHHHKILEARRE-----AACSDIKVSQ---LQFRNRTRSQLIYQTRDL           | 380        |
| MFTC_MYCTU        |           | DGPDPECVQGHSEPALARERHLPRPRADHSRGRRVSKPVPLTLSMRPPKRPC--N-ESPV         | 391        |
| DVU_0855          |           | MAEEPSCSYKPRRMTPC-----R-----                                         | 367        |
| Ddes_0287         |           | MGEELPLCTYIPAKMRKK-----GRDGKSGEEK-----                               | 414        |
| Mbur_1233         |           | MAEEPYCINPR-----                                                     | 346        |
| <b>Mbar_A1458</b> |           | <b>LEEEPYCIRPGKK-----</b>                                            | <b>349</b> |
|                   |           | : *                                                                  |            |

**Figure S2.** Amino acid sequence alignment of AhbD with the SPASM domain-containing Radical SAM enzymes anSME, SuiB, PqqE and MftC. Cluster-coordinating cysteine residues are highlighted in color as in Figure S1. Sequences are specified by UniProt entry names or gene numbers.

**Figure S3**

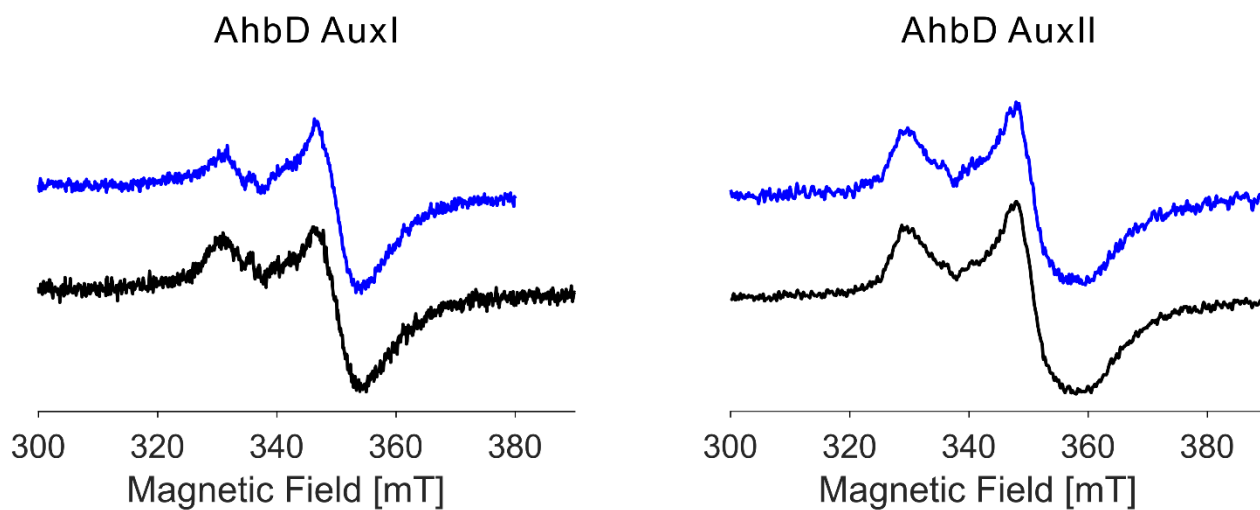

**Figure S3.** EPR Cw X-band spectra of the dithionite reduced AhbD variants AuxI (left) and AuxII (right) recorded before (blue) or after (black) iron-sulfur cluster reconstitution. Spectra were recorded at  $T = 13$  K and  $P_{\text{MW}} = 1$  mW. All other experimental parameters are given in the main text.

**Figure S4**

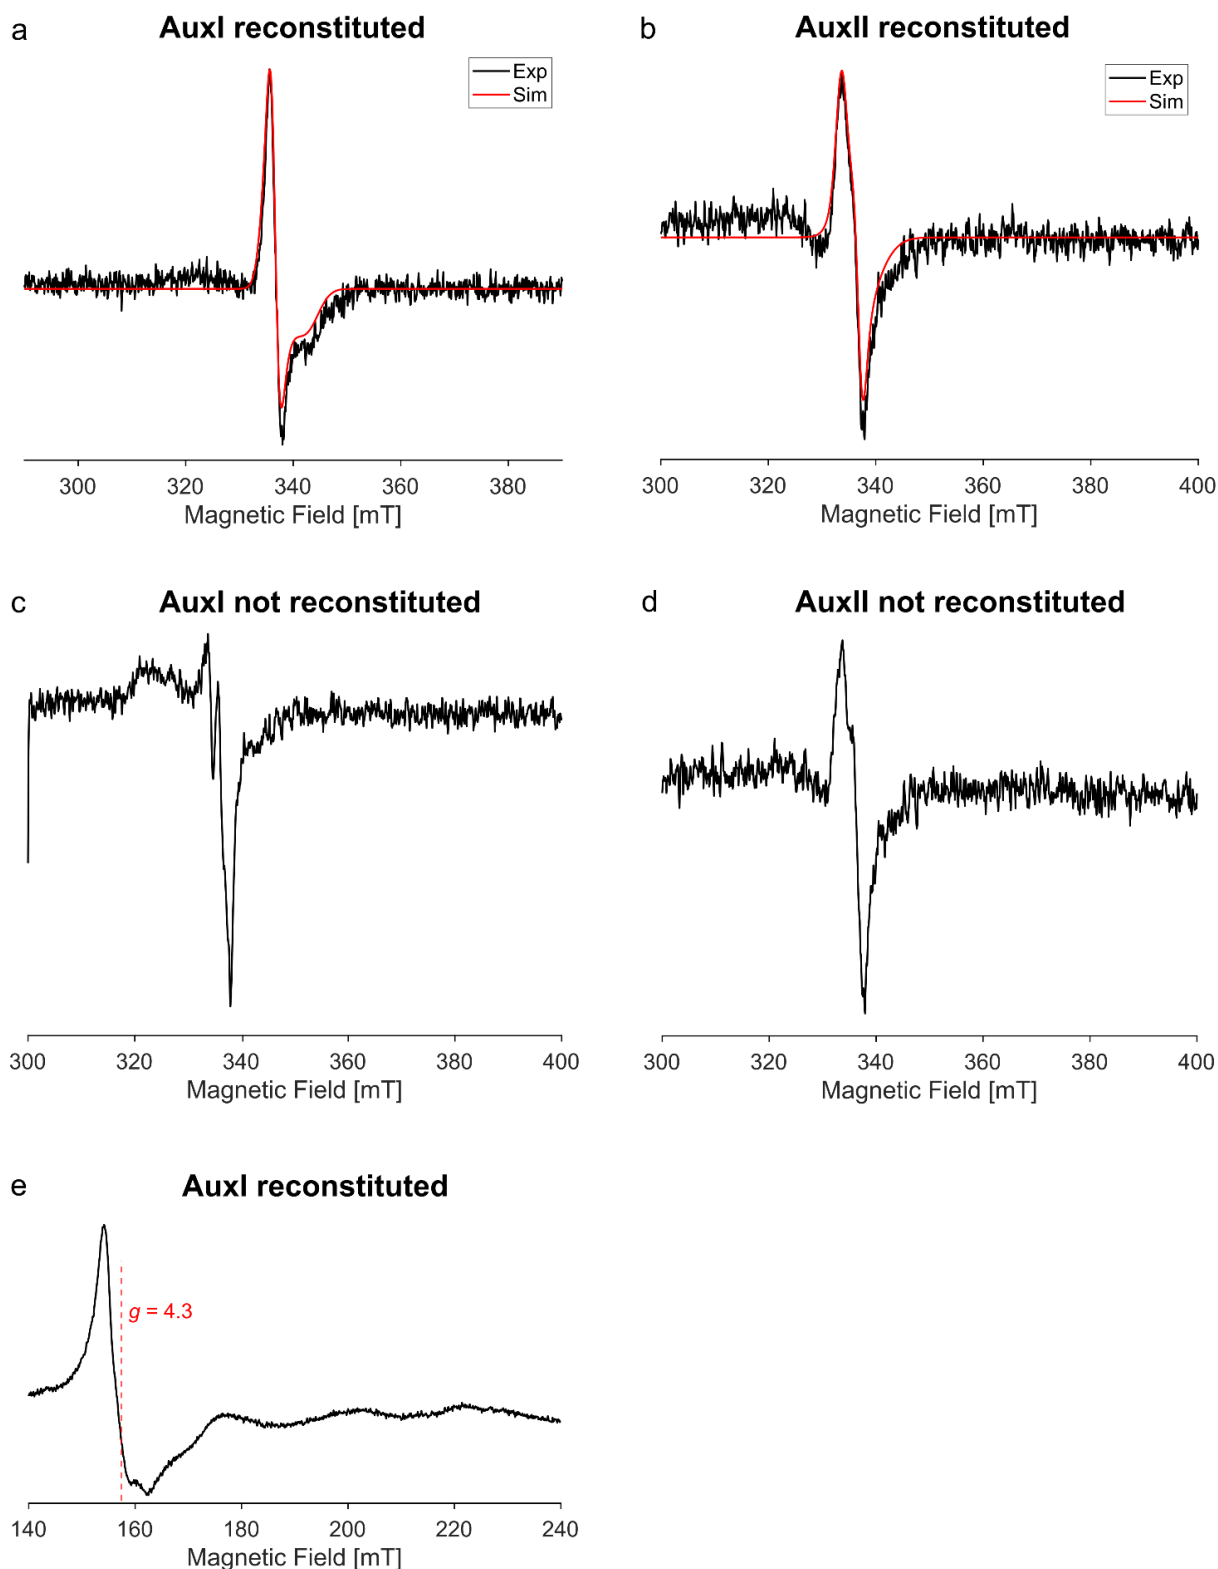

**Figure S4.** EPR Cw X-band spectra of the oxidized AhbD variants AuxI (a, c) and AuxII (b, d) recorded before (c, d) or after (a, b) iron-sulfur cluster reconstitution. Spectra a and b were simulated (red line) with  $g_x$ ;  $g_y$ ;  $g_z = 2.016$ ; 2.010; 1.973 and  $g_x$ ;  $g_y$ ;  $g_z = 2.026$ ; 2.007; 1.998, respectively. e) shows the signal of 'free' Fe(III) at  $g = 4.3$  contained within the reconstituted AuxI variant. Similar spectra with the same intensity of the peak at  $g = 4.3$  were obtained from the other samples. Spectra were recorded at  $T = 13$  K and  $P_{MW} = 1$  mW. All other experimental parameters are given in the main text.

**Figure S5**

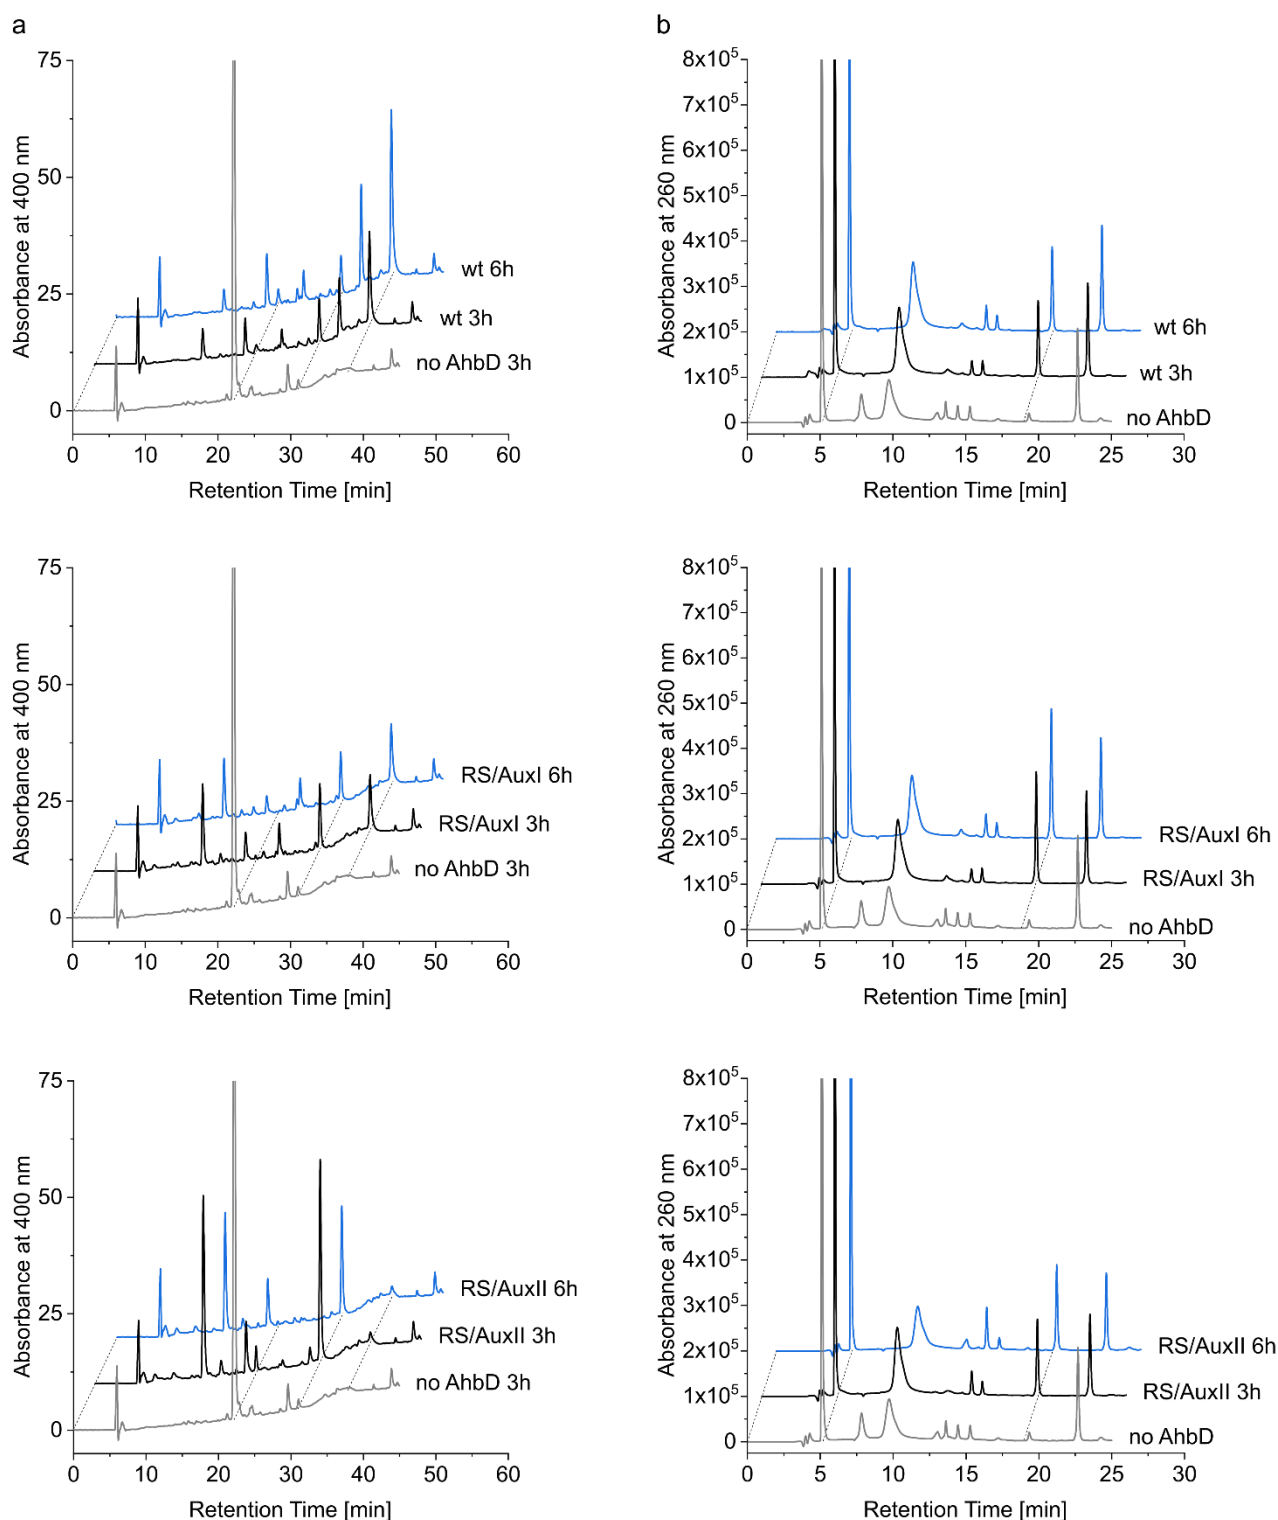

**Figure S5.** HPLC analysis of enzyme activity assay mixtures containing AhbD wt (top), variant RS/AuxI (middle) or RS/AuxII (bottom). a, HPLC separation of tetrapyrroles extracted from enzyme activity assay mixtures after 3 and 6 hours of incubation. FeCopro elutes at a retention time of 22.1 min, the monovinyl-intermediate at 31 min and heme at 37.8 min. b, HPLC separation of SAM cleavage products formed after 3 and 6 hours of incubation. SAM and 5'-dA elute at retention times of about 5 and 18.9 min, respectively.

**Table S1****Table S1.** Oligonucleotide primers for site-directed mutagenesis of the *ahbD* gene.

| Primer designation            | Sequence (5' → 3') <sup>1</sup>                                 |
|-------------------------------|-----------------------------------------------------------------|
| Mbar_C23A_C26A_rv             | CTTGCACCACG <u>AGC</u> ATGAAC <u>AGC</u> ATTCAGATTACAACC        |
| Mbar_C23A_C26A_fw             | GGTTGTAATCTGAAT <u>GCT</u> GTTTCAT <u>GCT</u> CGTGGTGCAAG       |
| Mbar_C256A_rv                 | AACCGGTGCCACCCAG <u>GCG</u> CACCTTTGGTCATTGCTTC                 |
| Mbar_C256A_fw                 | GAAGCAATGACCAAAGGT <u>GCG</u> CTGGGTGGCACCGGTT                  |
| Mbar_C274A_rv                 | GAACCGGCAGATAACCC <u>GCG</u> CGGAAAACTTTACCAACGC                |
| Mbar_C274A_fw                 | GCGTTGGTAAAGTTTTCC <u>GCG</u> GGTTATCTGCCGGTTC                  |
| Mbar_C312A_C315A_rv           | CTTTTTTATACTC <u>GCG</u> GATGCC <u>AGC</u> TTTACCTTTTCAGTTCTTCC |
| Mbar_C312A_C315A_fw           | GGAAGAACTGAAAGGTAAAGCTGGCATC <u>GCG</u> GAGTATAAAAAAG           |
| Mbar_C321A_rv                 | CACGACAACCTGCC <u>GCA</u> ACTTTTTTATACTCGGCGATG                 |
| Mbar_C321A_fw                 | CATCGCCGAGTATAAAAAAGTT <u>GCG</u> GCAGGTTGTCGTG                 |
| Mbar_C324A_rv<br>(for Q5 Kit) | ACTTTTTTATACTCGCAGATG                                           |
| Mbar_C324A_fw<br>(for Q5 Kit) | TTGTGCAGGT <u>GCT</u> CGTGCACGTG                                |

<sup>1</sup> Mutated codons are underlined.
